# Supplementary material for: β-Nicotinamide mononucleotide supplementation prolongs the lifespan of prematurely aged mice and protects colon function in ageing mice
Source: Royal Society of Chemistry journal article supplement (doi:10.1039/d3fo05221d), 2024-01-01

Supplementary Materials:

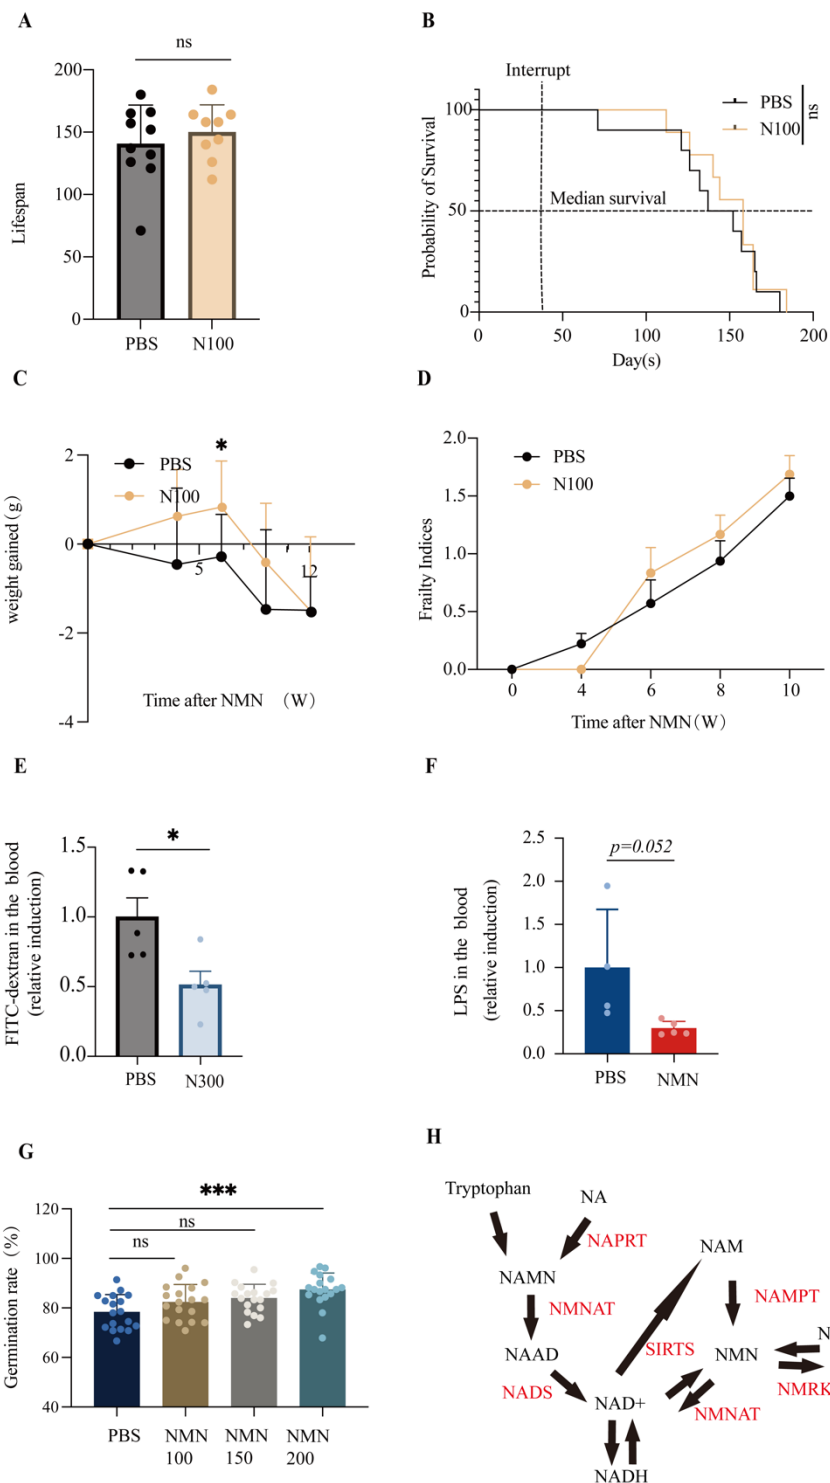

**Fig S1:**

A: The average life span (days) of *Zmpste24*<sup>-/-</sup> mice (n =9 OR 10). B: Survival curves for *Zmpste24*<sup>-/-</sup> mice (n =9 OR 10) with median lifespan (days) inset. C: The weight gained of *Zmpste24*<sup>-/-</sup> mice (n≥7). D: Frailty Indices were performed once every two weeks until natural death (n≥7). \*  $p < 0.05$ , \*\*  $p < 0.01$  and \*\*\*  $p < 0.001$  represent significant differences between the PBS group and the N100 group. E: Intestinal permeability was evaluated by the levels of *Zmpste24*<sup>-/-</sup> mice serum the fluoresce-in isothiocyanate (FITC)-dextran (n=5). F: Intestinal permeability was evaluated by the levels of *C57BL/6* mice serum Lipopolysaccharides (LPS). (n>=4). G: The germination rate of organoids derive from the PBS, NMN100, NMN150 and NMN200 group (n = 3), count 6 views per hole. H: NAD biosynthesis pathway. NA: nicotinic acid; NAMN: nicotinic acid mononucleotide; NAAD: nicotinic acid adenine dinucleotide; NMN: nicotinamide mononucleotide; NR: nicotinamide riboside; NADS: NAD Synthetase; NAPRT: Nicotinic Acid Phospho rybosyl transferase; NMNAT: Nicotinamide Mononucleotide Adenylyltransferase; NMRK1: Nicotinamide Riboside Kinases; NAM: nicotinamide. \*  $p < 0.05$ , \*\*  $p < 0.01$  and \*\*\*  $p < 0.001$  represent significant differences between the PBS group and the N300 group, between the PBS group and the NMN group between the PBS, the NMN100, NMN150, NMN200 group.

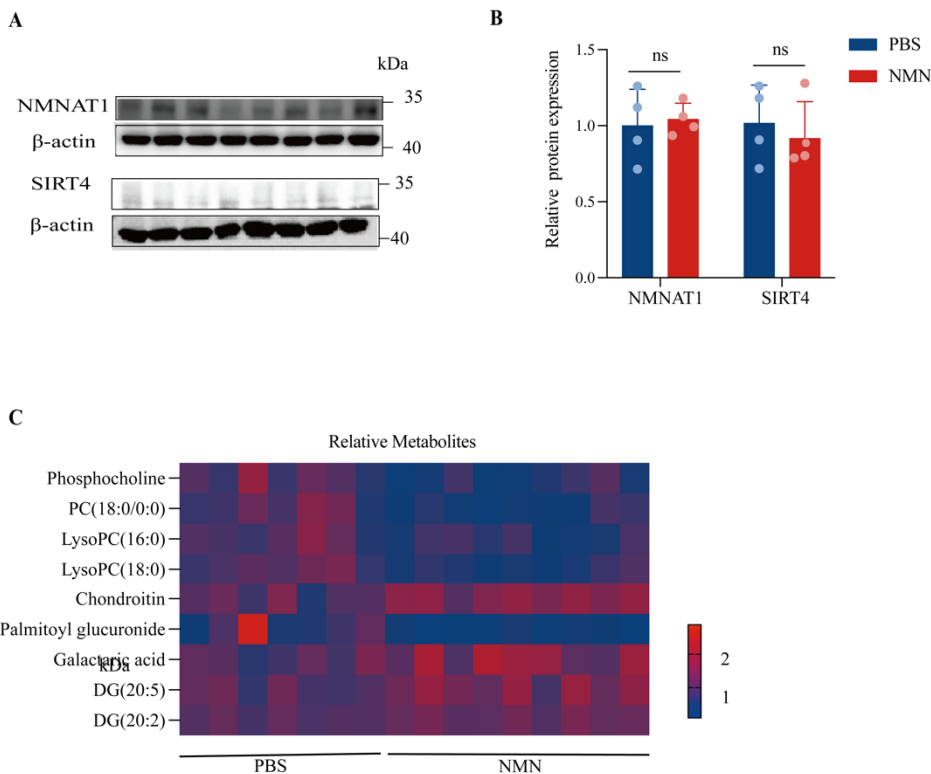

**Fig S2:**

A: Western blots for NMNAT1 and SIRT1 with  $\beta$ -actin as an internal control (n=4).

B: The protein level of NMNAT1 and SIRT1 quantification analyzed using ImageJ.

C: Metabolites based on the significant enrichment of the KEGG pathways ( $p < 0.05$ ). \*  $p <$

0.05, \*\*  $p < 0.01$  and \*\*\*  $p < 0.001$  represent significant differences between the PBS group

and the NMN group.

| <b>TABLE 1. Sequences of oligonucleotide primers</b> |                |                         |
|------------------------------------------------------|----------------|-------------------------|
| <b>Target gene</b>                                   | <b>Species</b> | <b>primer sequence</b>  |
| Actin forward                                        | mus            | GAGACCTTCAACACCCCAGC    |
| Actin reverse                                        | mus            | GGAGAGCATAGCCCTCGTAGAT  |
| SIRT1 forward                                        | mus            | CTCCACCAGCATTGGGAACT    |
| SIRT1 reverse                                        | mus            | GGAAGATGAAGTCAACCAACAGT |
| SIRT2 forward                                        | mus            | CTCTGACCCTCTGGAGACCC    |
| SIRT2 reverse                                        | mus            | ACAATCTGCCACAGCGTCAT    |
| SIRT3 forward                                        | mus            | TGCTGCAAGGTTCTACTC      |
| SIRT3 reverse                                        | mus            | AGTCGGGGCACTGATTTCTG    |
| SIRT4 forward                                        | mus            | ATTCCCCTGTGGAGAGTTG     |
| SIRT4 reverse                                        | mus            | TTCAGAGTTGGAGCGGCATT    |
| SIRT5 forward                                        | mus            | CTTTTGCAGCCTGCCTGG      |
| SIRT5 reverse                                        | mus            | GCAGGAGGCTTTCGTCTACA    |

|                          |     |                           |
|--------------------------|-----|---------------------------|
| SIRT6 forward            | mus | AAGTCTCACTGTGTCCCTTGTC    |
| SIRT6 reverse            | mus | TCACGAGCGGGTGTGATTG       |
| SIRT7 forward            | mus | GGGCCTAATGGAGTATGGACA     |
| SIRT7 reverse            | mus | CTCATGCAAACGGGTGATGC      |
| IL10 forward             | mus | CTTACTGACTGGCATGAGGATCA   |
| IL10 reverse             | mus | GCAGCTCTAGGAGCATGTGG      |
| TNF $\alpha$ forward     | mus | CCTGTAGCCCACGTCGTAG       |
| TNF $\alpha$ reverse     | mus | GGGAGTAGACAAGGTACAACCC    |
| IL6 forward              | mus | TGCAAGAGACTTCCATCCAGT     |
| IL6 reverse              | mus | GTGAAGTAGGGAAGGCCG        |
| Lgr5 forward             | mus | GCGATTTCTTTGAGGCTTTG      |
| Lgr5 reverse             | mus | ATCCGAAAGATTGGCATCAC      |
| $\beta$ -catenin forward | mus | AATCAGCTGGCCTGGTTTGA      |
| $\beta$ -catenin reverse | mus | CTGTGGCAAAAACATCAACGTG    |
| Axin2 forward            | mus | ATGAGTAGCGCCGTGTTAGTG     |
| Axin2 reverse            | mus | GGGCATAGGTTTGGTGGACT      |
| Wnt5a forward            | mus | CACGCTATACCAACTCCTCTGC    |
| Wnt5a reverse            | mus | AATATTCCAATGGGCTTCTCATGGC |
| Wnt6 forward             | mus | CGGAGACGATGTGGACTT        |
| Wnt6 reverse             | mus | GGAACCCGAAAGCCCATG        |
| NMNAT1 forward           | mus | GAAATTGCTGTGTGGGGCAG      |

|                |     |                       |
|----------------|-----|-----------------------|
| NMNAT1 reverse | mus | CCACGATTTGCGTGATGTCC  |
| NMNAT2 forward | mus | GATGTTTCGAGAGAGCCAGGG |
| NMNAT2 reverse | mus | AAGGCCCTGTTTTCCGTAGG  |
| NMNAT3 forward | mus | AAGACACCATCAGCCTCTGC  |
| NMNAT3 reverse | mus | CCAAGCCGAACTTCTCCACT  |

Raw western blot bands in Fig 2G, [Supplementary Fig.S2, A](#)

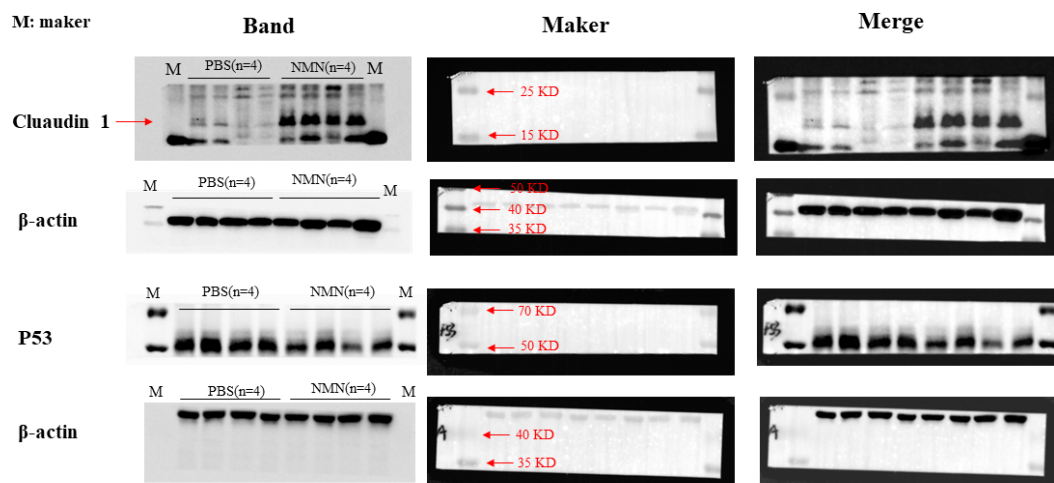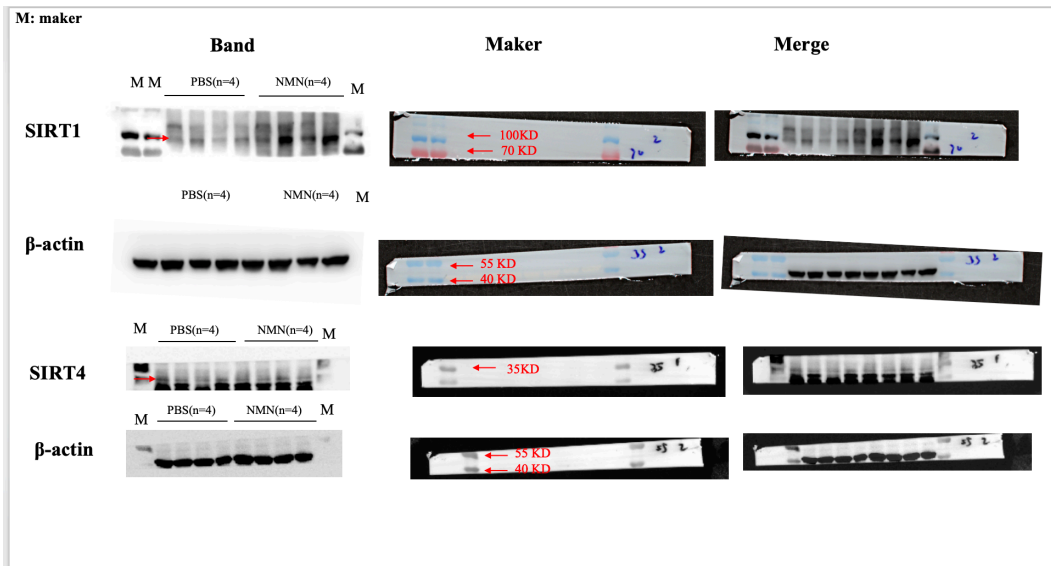

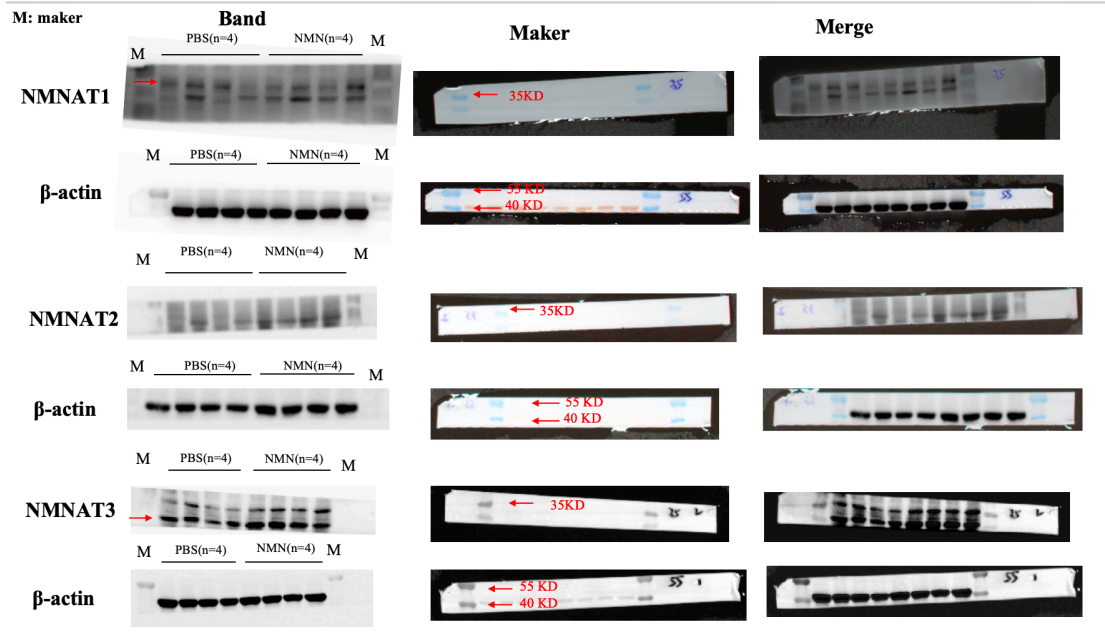

**Raw western blot bands in Fig 3 B**

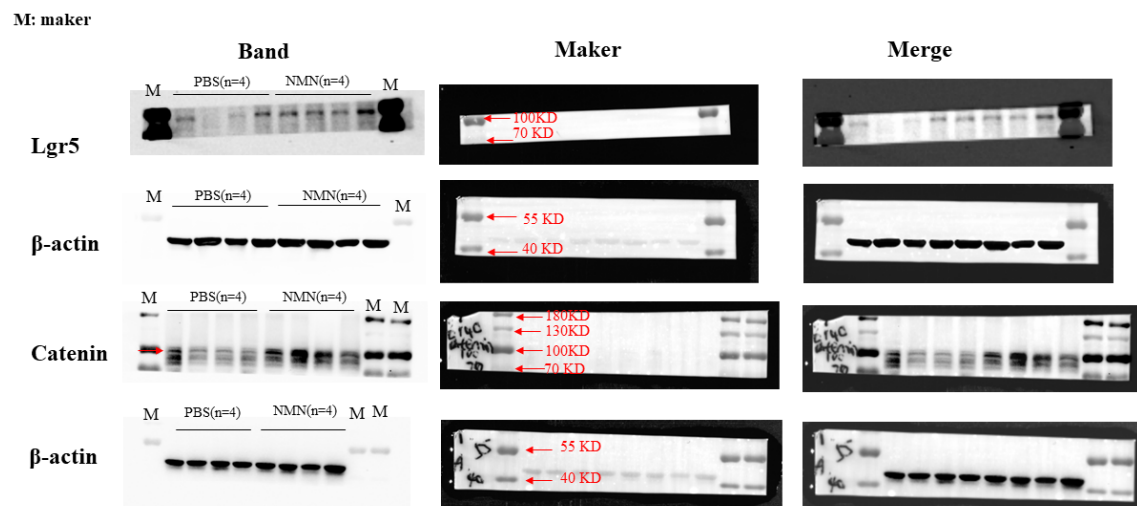

Supplement: d3fo05221d1.pdf [file d3fo05221d1.pdf]
